# Supplementary material for: Community differentiation of rhizosphere microorganisms and their responses to environmental factors at different development stages of medicinal plant Glehnia littoralis
Source: PeerJ. 2023 Mar 6;11:e14988. doi: 10.7717/peerj.14988 (PMC9997192; doi:10.7717/peerj.14988)
Supplement: Supplemental Information 3 [file peerj-11-14988-s003.xlsx]

## Sheet: Table S1
Table S1 Relative abundance of bacteria at phylum level at each development stage
Phyla	Ss (%)	Vs (%)	Hs (%)
Acidobacteriota	22.3014	19.6125	17.9418
Actinobacteriota	15.0189	11.8376	13.6647
Armatimonadota	0.145768	0.021521	0.00503601
Bacteroidota	2.17938	0.88383	2.46513
Bdellovibrionota	0.0142793	0.112496	0.242232
Campylobacterota	0.0565224	0.0352163	0.0720149
Chloroflexi	3.63945	2.83246	2.25865
Cyanobacteria	0.0107095	0.264611	0.0478421
Dadabacteria	0.000594972	0.000489115	0
Dependentiae	0.0559274	0.0855951	0.0428061
Desulfobacterota	0.0142793	0.0278795	0.253815
Elusimicrobiota	0.00118994	0.0547809	0.0030216
Fibrobacterota	0.000594972	0	0.0015108
Firmicutes	1.77123	0.951328	4.3355
Fusobacteriota	0.342109	0.000489115	0.220074
Gemmatimonadota	5.35713	4.08117	1.21317
Latescibacterota	0.00594972	0.00489115	0.00402881
Methylomirabilota	0.232039	0.0405965	0.0458277
Myxococcota	0.558679	0.659327	0.200433
Nitrospirota	0.584263	0.494006	0.301657
Patescibacteria	2.75234	5.4057	4.75601
Planctomycetota	2.51138	1.52066	0.761948
Proteobacteria	31.9423	41.363	41.1527
Sumerlaeota	0.00356983	0.000489115	0.0015108
Verrucomicrobiota	0.606277	0.289067	0.746336
unclassified_Bacteria	9.8938	9.42035	9.26222
