# Supplementary material for: Community differentiation of rhizosphere microorganisms and their responses to environmental factors at different development stages of medicinal plant Glehnia littoralis
Source: PeerJ. 2023 Mar 6;11:e14988. doi: 10.7717/peerj.14988 (PMC9997192; doi:10.7717/peerj.14988)
Supplement: Supplemental Information 4 [file peerj-11-14988-s004.xlsx]

## Sheet: Table S2
Table S2 Relative abundance of fungi at phylum level at each development stage
Phyla	Ss (%)	Vs (%)	Hs (%)
Ascomycota	70.6439	78.9768	80.1373
Basidiomycota	11.9263	15.1997	9.88124
Chytridiomycota	3.64345	0.227864	0.865844
Glomeromycota	0.0526754	0.112396	0.0855776
Kickxellomycota	0.00044265	0	0.000915269
Mortierellomycota	9.26865	1.43392	1.21365
Mucoromycota	0	0	0.0581196
Neocallimastigomycota	0	0	0.000915269
Olpidiomycota	0.0823329	0.00131714	0.00366108
Rozellomycota	0.283739	1.07961	0.892845
unclassified_Fungi	4.0985	2.96838	6.85994
