# Supplementary material for: Community differentiation of rhizosphere microorganisms and their responses to environmental factors at different development stages of medicinal plant Glehnia littoralis
Source: PeerJ. 2023 Mar 6;11:e14988. doi: 10.7717/peerj.14988 (PMC9997192; doi:10.7717/peerj.14988)
Supplement: Supplemental Information 5 — Ss, the seedling stage; Vs, the vigorous growth stage; Hs, the harvesting stage. [file peerj-11-14988-s005.xlsx]

## Sheet: Table S3
Table S3 Percentage of top ten functions of rhizosphere microorganisms in G.litteralis
Class2 KEGG pathway	Ss(%)	Vs(%)	Hs(%)
Global and overview maps	42.323	42.1322	42.2215
Carbohydrate metabolism	8.89105	8.66553	8.74242
Amino acid metabolism	7.39506	7.44447	7.38289
Energy metabolism	4.43012	4.46109	4.45235
Metabolism of cofactors and vitamins	4.17716	4.20026	4.23708
Membrane transport	3.33305	3.42062	3.28967
Nucleotide metabolism	3.01527	2.97188	3.09056
Translation	2.91818	2.86231	2.96181
Signal transduction	2.63629	2.74161	2.72718
Replication and repair	2.40753	2.35175	2.44866
Others	18.4733	18.7483	18.4459
