# Supplementary material for: Community differentiation of rhizosphere microorganisms and their responses to environmental factors at different development stages of medicinal plant Glehnia littoralis
Source: PeerJ. 2023 Mar 6;11:e14988. doi: 10.7717/peerj.14988 (PMC9997192; doi:10.7717/peerj.14988)
Supplement: Supplemental Information 6 — Ss, the seedling stage; Vs, the vigorous growth stage; Hs, the harvesting stage. [file peerj-11-14988-s006.xlsx]

## Sheet: Table S4
Table S4 Percentage of rhizosphere fungi of different trophic modes in G.litteralis
Trophic Mode	Ss(%)	Vs(%)	Hs(%)
Symbiotroph	0.939762	1.09322	4.63584
Saprotroph-Symbiotroph	9.6244	1.47783	1.38114
Saprotroph	39.2966	49.5076	60.5936
Pathotroph-Symbiotroph	0.251261	0.0522464	0.322632
Pathotroph-Saprotroph-Symbiotroph	7.11146	16.3557	7.56927
Pathotroph-Saprotroph	5.38799	2.29665	3.04281
Pathotroph	15.8359	0.517195	1.25575
Pathogen-Saprotroph-Symbiotroph	0.0965602	0.0381969	0.0677299
unidentified	21.4561	28.6613	21.1313
