# Supplementary material for: Community differentiation of rhizosphere microorganisms and their responses to environmental factors at different development stages of medicinal plant Glehnia littoralis
Source: PeerJ. 2023 Mar 6;11:e14988. doi: 10.7717/peerj.14988 (PMC9997192; doi:10.7717/peerj.14988)
Supplement: Supplemental Information 7 — Ss, the seedling stage; Vs, the vigorous growth stage; Hs, the harvesting stage. AP, available phosphorus; AK, available potassium; AN, ammonium nitrogen; SOM, soil organic matter; TOC, total organic carbon; NN, nitrate nitrogen; SC, Saccharase; UE, Urease; AKP, alkaline phosphatase; TN, total nitrogen; TH, total hydrogen; TC, total carbon; TS, total sulfur. [file peerj-11-14988-s007.xlsx]

## Sheet: Sheet1
Data1 Raw data for soil physiochemical properties (environmental factors)
Development stage	pH	AP (mg/kg)	AK (mg/kg)	UE (mg/g)	SC (mg/g)	AKP (mg/g)	NN (mg/kg)	SOM (g/kg)	AN (mg/kg)	TN (mg/kg)	TC (mg/kg)	TS (mg/kg)	TH (mg/kg)	TOC (mg/kg)
Ss	5.75	100.89	97.5	0.052	34.05	0.061	3.86	6.31	61.29	2700	9800	9270	7160	3662.68
Ss	5.99	53.5	77.9	0.203	16.64	0.061	5.67	5.68	52.61	2600	10200	7620	5730	3294.47
Ss	5.35	109.57	106.2	0.052	12.3	0.059	3.94	5.68	62.41	3000	10500	8290	6490	3298.81
Vs	4.44	61.31	60.6	0.068	66.1	0.007	36.63	7.06	15.08	2200	10300	8680	6410	4093.4
Vs	4.64	57.67	54.2	0.087	49.5	0.005	32.24	5.68	16.48	2200	8300	8380	6300	4260.02
Vs	4.51	65.82	73.9	0.089	71.37	0.015	33.6	7.34	24.95	2200	7400	7490	5770	3293.15
Hs	4.18	77.11	106.2	0.041	13.85	0.091	9.74	2.67	8.65	3100	10100	14520	7410	1549.41
Hs	4.13	107.83	109.4	0.044	16.11	0.072	16.07	1.94	6.72	3300	10900	23630	7810	1123.55
Hs	4.39	56.62	92.4	0.059	11.33	0.074	6.02	1.34	8.28	3000	10000	13660	6630	775.01
